# Supplementary material for: Japanese youth athletes’ mental health and psychological resilience during the COVID-19 pandemic
Source: Atypon-hosted journal article supplement (doi:10.1024/2674-0052/a000063), 2023-12-21
Supplement: 2674-0052_a000063_esm1.pdf [file 2674-0052_a000063_esm1.pdf]

<https://doi.org/10.1024/2674-0052/a000063>

© 2023 The Author(s) Distributed as a Hogrefe OpenMind article under the license CC BY-NC 4.0

(<https://creativecommons.org/licenses/by-nc/4.0>)

### **COVID-19-related questions**

Please answer the following questions with “Yes” or “No.”

Q4: Have you taken a test (e.g., PCR test) for COVID-19?

Q5: Have you been confirmed as infected with COVID-19 based on a test (e.g., PCR test)?

Q6: Has anyone in your family been infected with COVID-19?

Only students who are members of an athletic team should answer the following questions.

Past Selection History

Q11: Please indicate your past selection history. 0 National team of Japan, 1

Representative of the Kanto region, 2 Prefectural representative, 3 City representative, 4

No representation history

Past Tournament Participation Level

Q12: Please select your highest achievement in tournaments you have participated in. 0

International tournament, 1 National tournament, 2 Kanto regional tournament, 3

Prefectural tournament, 4 District tournament

## **Resilience Scale for Japanese High School Students**

Please select the number (1–7) that best represents your response for each question:

1. Not at all true, 2. Mostly not true, 3. Somewhat not true, 4. Neither agree nor disagree, 5. Somewhat true, 6. Mostly true, 7. Completely true.

- 1) When faced with difficulties, I can usually find a way out.
- 2) Most of the time, I deal with things calmly.
- 3) I am decisive.
- 4) My belief in myself gets me through tough times.
- 5) I feel able to handle many things at once.
- 6) I can usually manage to succeed one way or another.
- 7) I am at peace with myself.
- 8) Having faced difficulties before, I believe I can overcome future challenges.
- 9) When needed, people often rely on me.
- 10) I am proud of what I have accomplished in life.
- 11) I can control my emotions and desires.
- 12) I can usually find something to laugh about.
- 13) There are teachers at school who worry if I am absent.
- 14) There are teachers at school who believe in my potential to succeed.
- 15) There are teachers at school who always look out for me.
- 16) Outside of school and home, there is an adult I can trust.
- 17) Outside of school and home, there is an adult who consistently cares about me.
- 18) Outside of school and home, there is an adult who believes I will succeed.
- 19) I enjoy spending time and doing fun activities with my family.
- 20) My family and I make decisions together.
- 21) My family discusses any concerns or problems I have.
- 22) I have friends who always care about me.
- 23) I have friends I can talk to about my problems.
- 24) My friends aim to do what is right.

*Note.* This questionnaire was translated by the authors of this paper.

Ref. Nobunari A, Masaru U. Reliability and validity of the resilience scale for Japanese high school students. *Bull Inst Health Sport Sci.* 2012;35:67–72.
